# Supplementary material
Source: PubMed Central journal article supplement (PMC8908464)
Supplement: NIHMS1783624-supplement-Supplemental_Materials.pdf [file NIHMS1783624-supplement-Supplemental_Materials.pdf]

## SUPPLEMENTAL MATERIAL

### **Smoking-Cessation Pharmacotherapy for Patients with Stroke and Transient Ischemic Attack: Systematic Review**

Neal S. Parikh, MD, MS; Setareh Salehi Omran, MD; Hooman Kamel, MD; Mitchell S.V. Elkind, MD, MS; Joshua Willey, MD, MS

#### **Table of Contents**

|                                    |        |
|------------------------------------|--------|
| Clinicaltrials.gov search strategy | Page 2 |
| Supplemental Table I               | Page 3 |
| Supplemental Table II              | Page 5 |

**Clinicaltrials.gov** search strategy:

“stroke OR transient ischemic attack OR cerebrovascular | Stroke | Varenicline OR chantix OR nicotine OR bupropion OR wellbutrin OR smoking OR cessation | Adult, Older Adult”

**Table I. Medline search strategy for pharmacological smoking cessation therapy in patients with stroke and transient ischemic attack**

| Search Number | Description                                                                                                                                                                                                                                                                                                                            |
|---------------|----------------------------------------------------------------------------------------------------------------------------------------------------------------------------------------------------------------------------------------------------------------------------------------------------------------------------------------|
| 1             | "smoking cessation"[MeSH Terms]                                                                                                                                                                                                                                                                                                        |
| 2             | (((((cigarette*[tiab] OR tobacco[tiab] OR smoking[mesh] OR smoking[tiab] OR smoker*[tiab]) AND (cease*[tiab] OR cessation[tiab] OR quit*[tiab] OR stop*[tiab])))                                                                                                                                                                       |
| 3             | (#1 or #2)                                                                                                                                                                                                                                                                                                                             |
| 4             | "bupropion"[MeSH Terms]                                                                                                                                                                                                                                                                                                                |
| 5             | bupropion[tiab]                                                                                                                                                                                                                                                                                                                        |
| 6             | zyban[tiab]                                                                                                                                                                                                                                                                                                                            |
| 7             | amfebutamone[tiab]                                                                                                                                                                                                                                                                                                                     |
| 8             | varenicline[tiab]                                                                                                                                                                                                                                                                                                                      |
| 9             | chantix[tiab]                                                                                                                                                                                                                                                                                                                          |
| 10            | champix[tiab]                                                                                                                                                                                                                                                                                                                          |
| 11            | ((((nicotine[tiab] AND (patch[tiab] OR patches[tiab] OR lozenge[tiab] OR lozenges[tiab] OR inhaler[tiab] OR inhalers[tiab] OR nasal spray[tiab] OR nasal sprays[tiab] OR transdermal system*[tiab] OR gum[tiab] OR polacrilex[tiab] OR replacement[tiab])))                                                                            |
| 12            | nicoderm[tiab]                                                                                                                                                                                                                                                                                                                         |
| 13            | nicorette[tiab]                                                                                                                                                                                                                                                                                                                        |
| 14            | nrt[tiab]                                                                                                                                                                                                                                                                                                                              |
| 15            | habitrol[tiab]                                                                                                                                                                                                                                                                                                                         |
| 16            | pharmacotherap*[tiab]                                                                                                                                                                                                                                                                                                                  |
| 17            | (((((pharmaco[tw] OR pharmacological[tw]) AND (therap*[tw] OR intervention*[tw])))                                                                                                                                                                                                                                                     |
| 18            | combined modality therapy[MeSH Terms]                                                                                                                                                                                                                                                                                                  |
| 19            | combined modality therap*[tiab]                                                                                                                                                                                                                                                                                                        |
| 20            | combination therap*[tiab]                                                                                                                                                                                                                                                                                                              |
| 21            | combination treat*[tiab]                                                                                                                                                                                                                                                                                                               |
| 22            | Tobacco use cessation products[mesh]                                                                                                                                                                                                                                                                                                   |
| 23            | (((((("Electronics"[mesh:noexp] OR "Electrical Equipment and Supplies"[Mesh:noexp] OR "Nebulizers and Vaporizers"[Mesh:NoExp]) AND ("tobacco products"[mesh] OR "tobacco use cessation products"[mesh] OR "tobacco use disorder"[mesh] OR "smoking cessation"[mesh] OR "smoking"[mesh:noexp] OR "nicotine"[mesh] OR "tobacco"[mesh]))) |
| 24            | ((electronic[tiab] AND cig*[tiab]))                                                                                                                                                                                                                                                                                                    |
| 25            | ((e cig*[tiab] OR ecig*[tiab]))                                                                                                                                                                                                                                                                                                        |
| 26            | vaper*[tiab]                                                                                                                                                                                                                                                                                                                           |
| 27            | vape[tiab]                                                                                                                                                                                                                                                                                                                             |

|    |                                                                         |
|----|-------------------------------------------------------------------------|
| 28 | vaping[tiab]                                                            |
| 29 | ((vapor[tiab] OR vapour[tiab]) AND cigarette*[tiab]))                   |
| 30 | electronic smok*[tiab]                                                  |
| 31 | ((nicotine[tiab] AND (inhaler*[tiab] OR inhalator*[tiab])))             |
| 32 | #4 OR #5 OR #6 ... OR #31                                               |
| 33 | (#3 AND #32)                                                            |
| 34 | "cerebrovascular disorders"[MeSH Terms]                                 |
| 35 | cerebrovascular[tiab]                                                   |
| 36 | "stroke"[MeSH Terms]                                                    |
| 37 | stroke*[tiab]                                                           |
| 38 | ((brain[tiab] OR cerebral[tiab]) AND (accident*[tiab] OR injur*[tiab])) |
| 39 | ((brain*[tiab] OR cerebral[tiab] or lacunar[tiab]) AND infarct*[tiab])) |
| 40 | ischaem*[tiab]                                                          |
| 41 | ischem*[tiab]                                                           |
| 42 | lacun*[tiab]                                                            |
| 43 | small vessel disease[tiab]                                              |
| 44 | cerebral small vessel disease*[tiab]                                    |
| 45 | intracranial hemorrhage*[tiab]                                          |
| 46 | intracerebral hemorrhage*[tiab]                                         |
| 47 | ich[tiab]                                                               |
| 48 | subarachnoid hemorrhage[tiab]                                           |
| 49 | sah[tiab]                                                               |
| 50 | reversible cerebral vasoconstriction syndrome[tiab]                     |
| 51 | rcvs[tiab]                                                              |
| 52 | cerebral angiopathy[tiab]                                               |
| 53 | tia[tiab]                                                               |
| 54 | transient ischem*[tiab]                                                 |
| 55 | transient ischaem*[tiab]                                                |
| 56 | #34 OR #35 OR ... OR #55                                                |
| 57 | #33 AND #56                                                             |

**Table II. Cochrane Database search strategy for pharmacological smoking cessation therapy in patients with stroke and transient ischemic attack**

| ID  | Search                                                                                                                                                                                                                                     |
|-----|--------------------------------------------------------------------------------------------------------------------------------------------------------------------------------------------------------------------------------------------|
| #1  | MeSH descriptor: [Smoking Cessation] explode all trees                                                                                                                                                                                     |
| #2  | (cigarette* or tobacco or smoking or smoker*):ti,ab,kw and (cease* or cessation or quit* or stop*):ti,ab,kw in Trials (Word variations have been searched)                                                                                 |
| #3  | #1 or #2                                                                                                                                                                                                                                   |
| #4  | MeSH descriptor: [Bupropion] explode all trees                                                                                                                                                                                             |
| #5  | MeSH descriptor: [Varenicline] explode all trees                                                                                                                                                                                           |
| #6  | MeSH descriptor: [Tobacco Use Cessation Products] explode all trees                                                                                                                                                                        |
| #7  | zyban:ti,ab,kw in Trials                                                                                                                                                                                                                   |
| #8  | bupropion:ti,ab,kw in Trials                                                                                                                                                                                                               |
| #9  | varenicline:ti,ab,kw in Trials                                                                                                                                                                                                             |
| #10 | chamfix:ti,ab,kw in Trials                                                                                                                                                                                                                 |
| #11 | chantix:ti,ab,kw in Trials                                                                                                                                                                                                                 |
| #12 | (nicotine and (patch or patches or lozenge or lozenges or inhaler or inhalers or "nasal spray" or "nasal sprays" or transdermal next system* or gum or polacrilex or replacement)):ti,ab,kw in Trials (Word variations have been searched) |
| #13 | nicoderm:ti,ab,kw in Trials                                                                                                                                                                                                                |
| #14 | nicorette:ti,ab,kw in Trials                                                                                                                                                                                                               |
| #15 | habitrol:ti,ab,kw in Trials                                                                                                                                                                                                                |
| #16 | nrt:ti,ab,kw in Trials                                                                                                                                                                                                                     |
| #17 | #4 or #5 or #6 or #7 or #8 or #9 or #10 or #11 or #12 or #13 or #14 or #15 or #16 in Trials                                                                                                                                                |
| #18 | #3 and #17 in Trials                                                                                                                                                                                                                       |
| #19 | MeSH descriptor: [Cerebrovascular Disorders] explode all trees                                                                                                                                                                             |
| #20 | MeSH descriptor: [Stroke] explode all trees                                                                                                                                                                                                |
| #21 | cerebrovascular:ti,ab,kw in Trials                                                                                                                                                                                                         |
| #22 | stroke:ti,ab,kw in Trials                                                                                                                                                                                                                  |
| #23 | strokes:ti,ab,kw in Trials                                                                                                                                                                                                                 |
| #24 | isch*m*:ti,ab,kw in Trials                                                                                                                                                                                                                 |
| #25 | ((brain* or cerebral) and (accident* or infarct*)):ti,ab,kw in Trials                                                                                                                                                                      |
| #26 | ((brain* or cerebral or lacunar) and infarct*):ti,ab,kw in Trials                                                                                                                                                                          |
| #27 | lacun*:ti,ab,kw in Trials                                                                                                                                                                                                                  |
| #28 | small vessel disease:ti,ab,kw in Trials                                                                                                                                                                                                    |
| #29 | cerebral small vessel disease*:ti,ab,kw in Trials                                                                                                                                                                                          |
| #30 | intracranial hemorrhage*:ti,ab,kw in Trials (Word variations have been searched)                                                                                                                                                           |
| #31 | intracerebral hemorrhage*:ti,ab,kw in Trials (Word variations have been searched)                                                                                                                                                          |
| #32 | ich:ti,ab,kw in Trials                                                                                                                                                                                                                     |
| #33 | subarachnoid hemorrhage:ti,ab,kw in Trials                                                                                                                                                                                                 |
| #34 | sah:ti,ab,kw in Trials                                                                                                                                                                                                                     |
| #35 | reversible cerebral vasoconstriction syndrome:ti,ab,kw in Trials                                                                                                                                                                           |
| #36 | rcvs:ti,ab,kw in Trials                                                                                                                                                                                                                    |

|     |                                                                                                                                                        |
|-----|--------------------------------------------------------------------------------------------------------------------------------------------------------|
| #37 | cerebral angiopathy:ti,ab,kw in Trials                                                                                                                 |
| #38 | tia:ti,ab,kw                                                                                                                                           |
| #39 | transient ischemic attack:ti,ab,kw                                                                                                                     |
| #40 | transient ischaemic attack:ti,ab,kw                                                                                                                    |
| #41 | #19 or #20 or #21 or #22 or #23 or #24 or #25 or #26 or #27 or #28 or #29 or #30 or #31 or #32 or #33 or #34 or #35 or #36 or #37 or #38 or #39 or #40 |
| #42 | #18 and #41 in Trials                                                                                                                                  |
